# Supplementary material for: Lesion Penetration and Activity Limit the Utility of Second-Line Injectable Agents in Pulmonary Tuberculosis
Source: PubMed Central journal article supplement (PMC8448094; doi:10.1128/aac.00506-21), 2021-09-17
Supplement: aac.00506-21-s0001.pdf [file aac.00506-21-s0001.pdf]

## 1 Supplemental Tables

- 2 **Table S1.** Comparative pharmacokinetic parameters of AMK and KAN at 1,000 mg in human subjects and  
3 25 mg/kg in New Zealand White rabbits.

|                                                           | AMK                | KAN              |
|-----------------------------------------------------------|--------------------|------------------|
| C <sub>max</sub> rabbits 25 mg/kg (mg/L)                  | 90 (75 – 110)      | 101 (75-133)     |
| C <sub>max</sub> clinical (1,000 mg or 15 mg/kg) (mg.h/L) | 33 (20 – 60) (1-3) | 35 (20 – 50) (4) |
| AUC rabbits 25 mg/kg (mg/L)                               | 178 (140 – 250)    | 178 (147 – 213)  |
| AUC clinical (1,000 mg or 15 mg/kg) (mg.h/L)              | 225 (5, 6)         | 190 (7)          |

5 **Table S2.** Description of human subject characteristics (ClinicalTrials.gov ID #NCT00816426)

| Subject | Gender | Age | BMI  | Weight (kg) | Prior TB episodes <sup>(a)</sup> | Study drugs single dose | Study drugs at steady state | Cavitary disease | Other anti-TB agents at steady state <sup>(b)</sup> | time of surgery post study drugs |
|---------|--------|-----|------|-------------|----------------------------------|-------------------------|-----------------------------|------------------|-----------------------------------------------------|----------------------------------|
| G101    | Male   | 27  | 24.0 | 73.7        | 2                                | INH, RIF, PZA           | MXF, KAN                    | Yes              | LZD, AUG, CLA                                       | 25h 20min                        |
| G402    | Male   | 40  | 17.3 | 57          | 2                                | RIF, PZA, KAN           | INH, MXF                    | Yes              | EMB                                                 | 24h 20min                        |
| G105    | Male   | 54  | 29.4 | 84          | 2                                | INH, RIF, PZA, MXF, KAN |                             | Yes              | LZD, AMK, PAS, CFZ, PIP                             | 12h 35min                        |
| G106    | Female | 48  | 22.2 | 54.3        | 1                                | INH, RIF, PZA, KAN      | MXF                         | Yes              | LZD, CS, AMX, PTH, PAS                              | 11h 00min                        |
| G102    | Male   | 43  | 27.1 | 79.6        | 2                                | INH, RIF, PZA           | MXF, KAN                    | Yes              | LZD, PAS, AUG                                       | 11h 12min                        |
| G103    | Female | 23  | 18.8 | 49.8        | 2                                | INH, RIF, PZA, MXF, KAN |                             | No               | LZD, CS, CFZ                                        | 4h 56min                         |
| G108    | Male   | 47  | 18.9 | 57.8        | 1                                | RIF, PZA, MXF, KAN      | INH                         | No               | LZD, CS, AUG, PTH, STM                              | 5h 41min                         |
| G303    | Male   | 39  | 22.2 | 65.7        | 4                                | INH, RIF, MXF, KAN      | PZA                         | Yes              | CS, LFX, PTH, STM                                   | 4h 23min                         |
| G109    | Female | 58  | 21.2 | 62          | 1                                | INH, RIF, PZA, MXF      | KAN                         | ?                | LZD, CS, PAS                                        | 21h 55min                        |
| G104    | Female | 27  | 20.0 | 52.5        | 1                                | INH, RIF, MXF, KAN      | PZA                         | No               | LZD, CS, AUG, STM                                   | 3h 18min                         |
| G401    | Male   | 44  | 24.1 | 58          | 1                                | RIF, PMXF, KAN          | INH, PZA                    | Yes              | EMB, LFX                                            | 8h 30min                         |

6 <sup>(a)</sup> all subjects had either MDR- or XDR-TB

7 <sup>(b)</sup> AMK, amikacin; AUG, amoxicillin/clavulanate; CFZ, clofazimine; CLA, clarithromycin; CS, cycloserine; EMB, ethambutol; LFX, levofloxacin; LZD,  
8 linezolid; PAS, para-aminosalicylate; PTH, prothionamide; STM, streptomycin; PIP: piperacillin/tazobactam.

9 **Table S3.** Number of observations of KAN or AMK concentration in rabbit plasma and tissue including  
 10 uninvolved lung and tubercular lesions. Samples were analyzed via LCMS or LCM. n, number of samples;  
 11 N, number of subjects, LCMS, liquid chromatography mass spectrometry; LCM, laser capture  
 12 microdissection.

|                              | <b>AMK</b> | <b>KAN</b> |
|------------------------------|------------|------------|
| Observations, total (n, N)   | 169, 9     | 144, 5     |
| Plasma (LCMS, LCM)           | 45, 0      | 26, 0      |
| Uninvolved lung (LCMS, LCM)  | 23, 11     | 29, 12     |
| Cellular lesions (LCMS, LCM) | 9, 11      | 26, 12     |
| Caseous lesions (LCMS, LCM)  | 59, 0      | 24, 0      |
| Caseum (LCMS, LCM)           | 0, 11      | 1, 14      |

13

14 **Table S4.** Model-based clinical predictions of  $C_{max}$ , AUC, and time relative to MIC per lesion for (A.) AMK  
 15 and (B.) KAN.  $C_{max}$  and unbound  $C_{max}$  relative to MIC,  $MaIC_{90}$ , and  $casMBC_{90}$ . Values in mg/L (plasma) or  
 16 mg/kg (lung and lesions). AUC and unbound AUC relative to MIC. Values in mg\*h/L (plasma) or mg\*h/kg  
 17 (lung and lesions). Time above MIC, Macrophage  $IC_{90}$ , or caseum  $MCB_{90}$  within a 24-hour period of once  
 18 daily dosing at steady-state. Values are hours above target with a maximum of 24.

A. AMK

|                          | Plasma | Uninvolved lung | Cellular lesion | Caseous lesion | Caseum |
|--------------------------|--------|-----------------|-----------------|----------------|--------|
| $C_{max}$                | 45.7   | 14.4            | 12.0            | 17.7           | 26.7   |
| f $C_{max}$              | 41.1   | 12.9            | 10.8            | 16.0           | 24.1   |
| f $C_{max}/MIC$          | 41.1   | 12.9            | 10.8            | 16.0           | 24.1   |
| $C_{max}/MaIC_{90}$      | 6.0    | 1.9             | 1.6             | 2.3            | 3.5    |
| $C_{max}/casMBC_{90}$    | 2.4    | 0.8             | 0.6             | 0.9            | 1.4    |
| AUC                      | 216.9  | 94.8            | 100.2           | 134.1          | 201.1  |
| fAUC/MIC                 | 195.2  | 85.3            | 90.2            | 120.7          | 181.0  |
| Time above MIC           | 24     | 14              | 17              | 19             | 24     |
| Time above $MaIC_{90}$   | 7      | 6               | 5               | 7              | 9      |
| Time above $casMBC_{90}$ | 4      | 0               | 0               | 0              | 4      |

B. KAN

|                          | Plasma | Uninvolved lung | Cellular lesion | Caseous lesion | Caseum |
|--------------------------|--------|-----------------|-----------------|----------------|--------|
| $C_{max}$                | 26.5   | 6.7             | 8.6             | 9.2            | 9.2    |
| f $C_{max}$              | 26.5   | 6.7             | 8.6             | 9.2            | 9.2    |
| f $C_{max}/MIC$          | 13.2   | 3.4             | 4.3             | 4.6            | 4.6    |
| $C_{max}/MaIC_{90}$      | 1.9    | 0.5             | 0.6             | 0.7            | 0.7    |
| $C_{max}/casMBC_{90}$    | 0.1    | 0.0             | 0.0             | 0.0            | 0.0    |
| AUC                      | 216.9  | 73.3            | 98.5            | 103.3          | 107.8  |
| fAUC/MIC                 | 108.5  | 36.7            | 49.2            | 51.6           | 53.9   |
| Time above MIC           | 19     | 14              | 16              | 17             | 17     |
| Time above $MaIC_{90}$   | 6      | 0               | 0               | 0              | 0      |
| Time above $casMBC_{90}$ | 0      | 0               | 0               | 0              | 0      |

19

20

21 **Supplemental Figures**

22

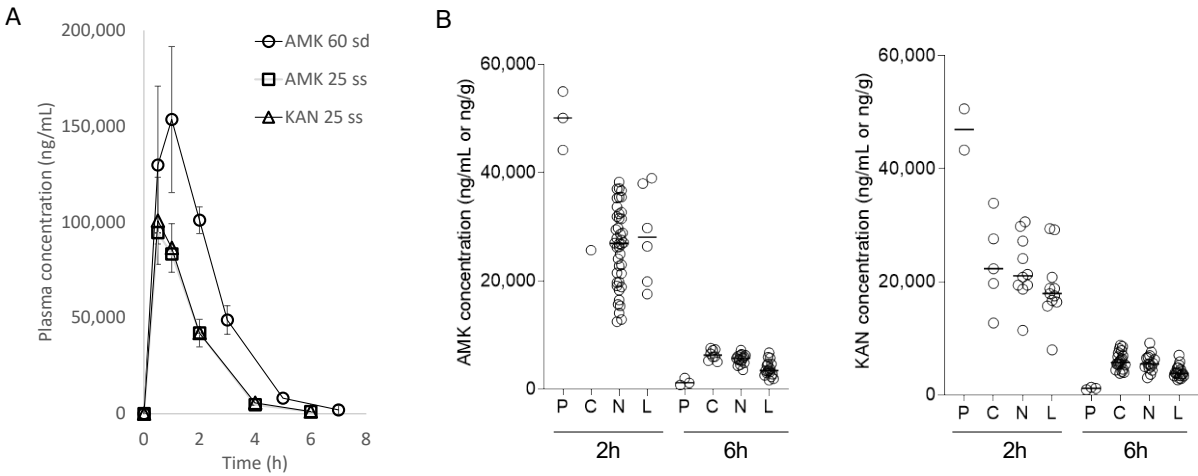

23

24 **Figure S1.** Rabbit pharmacokinetics of AMK and KAN. **(A)** Plasma concentration-time profiles in uninfected  
25 rabbits and rabbits with active TB. In a dose finding study, three uninfected rabbits received a single 60  
26 mg/kg dose (sd) of AMK administered via the intramuscular route; in tissue and lesion distribution studies,  
27 groups of 5 or 6 rabbits received 3 daily doses (steady state or ss) of AMK or KAN administered via the  
28 intramuscular route, as indicated. **(B)** Drug concentrations in lung and lesion homogenates of TB infected  
29 rabbits following three daily doses of 25 mg/kg AMK and KAN. P: plasma; C: cellular lesion; N: necrotic  
30 (caseous) lesion; L: uninvolved lung. A sample size of 3 animals per drug treatment and time point was  
31 selected based on historic ability to build PK models that deliver adequate fit. Animals that did not present  
32 adequate pathology or adequate number of evaluable lesions were replaced until we reached N=3. For  
33 LCMS quantitation in homogenized tissue/lesions, the following number of lesions per animal were  
34 collected: (i) 6 pieces of uninvolved lung with the exception of 2 rabbits at the 2h AMK time point, which  
35 had extensive pathology to the extent that it was difficult to locate uninvolved lung (3 pieces were  
36 collected in these rabbits), (ii) 5 to 10 cellular lesions with the exception of the same 2 rabbits where all  
37 but one lesion were necrotic, (iii) 3 to 26 necrotic lesions (more necrotic lesions were collected when  
38 cellular lesions could not be found).

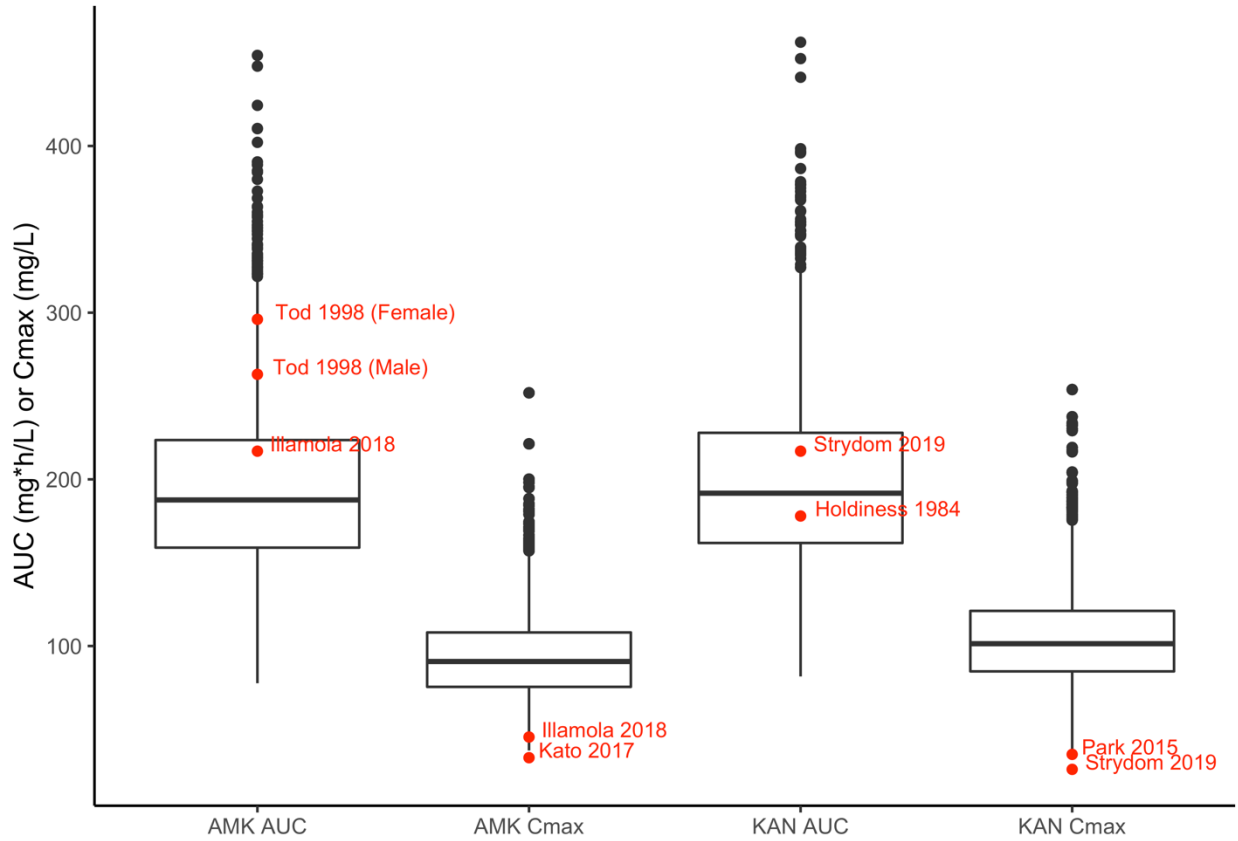

39

40 **Figure S2.** Comparison of steady state AUC (area under the concentration-time curve) and C<sub>max</sub> (peak  
 41 plasma concentration) in rabbits after three 25 mg/kg intramuscular doses (black box and whisker plots)  
 42 and in TB patients receiving 1,000 mg daily (red dots retrieved from published studies). Emphasis was  
 43 placed on matching AUC since it is considered the driver of aminoglycoside efficacy. References: (1, 4, 5,  
 44 7-9)

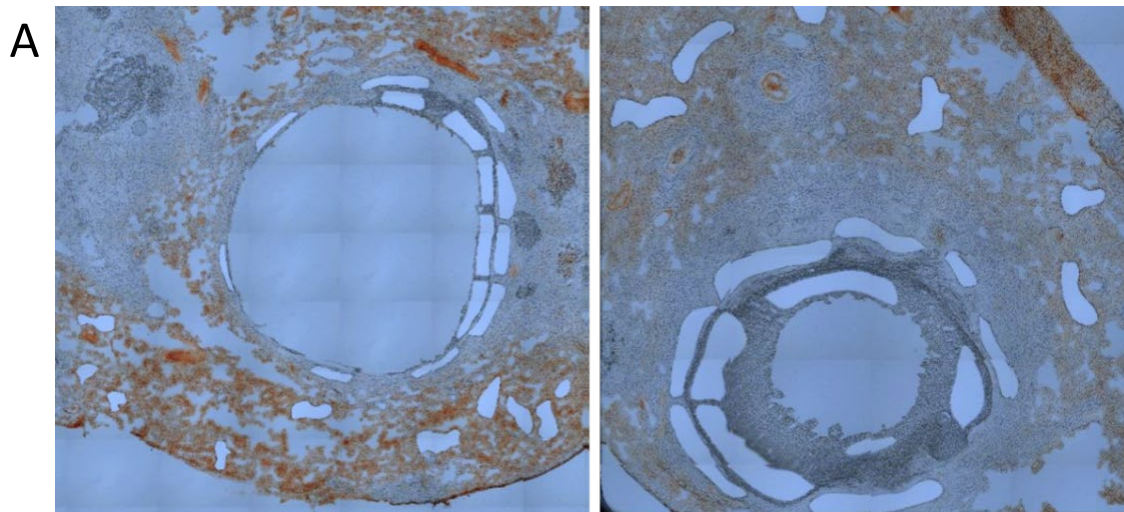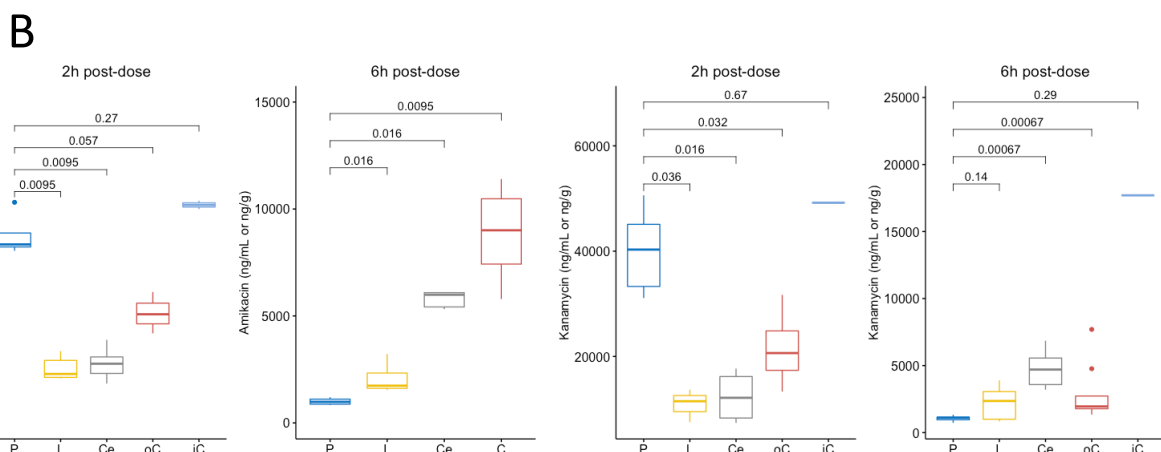

45

46 **Figure S3.** Sample size and statistical analysis of data shown in **Figure 1C**. For drug quantitation by laser

47 capture microdissection, large necrotic lesions and cavities were collected with the surrounding

48 uninvolved lung, as follows: AMK 2h: 6 lesions; AMK 6h: 6 lesions; KAN 2h: 4 lesions; KAN 6h: 8 lesions.

49 **(A)** Representative large cavities collected from the AMK rabbits analyzed 6h post dose, from which the

50 inner caseum is missing, either because it emptied prior to lesion removal at the time of euthanasia, or

51 because it fell apart at the time of cryosectioning. Consequently, only “caseum” (C) is reported in Figure

52 1C for AMK at 6h post dose. **(B)** Box-and-whisker plots and statistical analysis of absolute concentrations

53 of AMK and KAN in plasma and infected lung regions determined by laser-capture microdissection and

54 LC/MS-MS. P: plasma; L: uninvolved lung; Ce: cellular rim; C: caseum; oC: outer caseum; iC: inner caseum.

55 The horizontal bar is the median, the hinges are the interquartile range (IQR), the whiskers extend to  
56  $1.5 \times \text{IQR}$ , and dots are outliers. Drug concentrations in tissue compartments were compared to plasma  
57 concentrations using the Wilcoxon test.



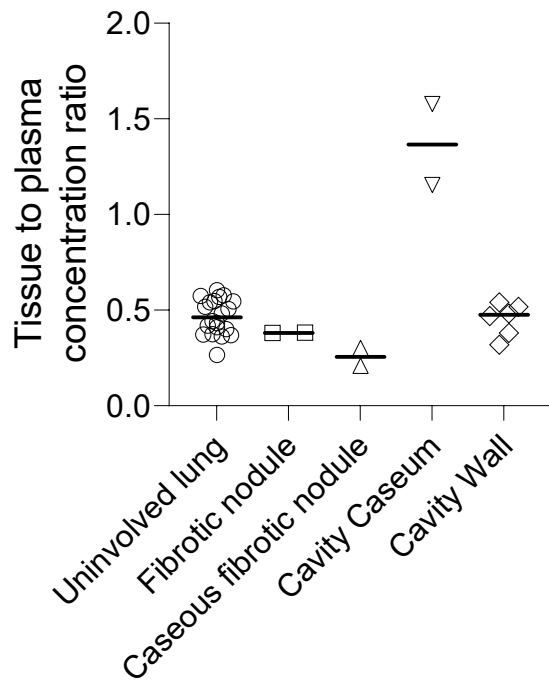

58

59 **Figure S4.** Partitioning of streptomycin in rabbit lung and lesion compartments 3h after a single 20

60 mg/kg dose. Concentrations were measured in tissue homogenates and normalized to plasma

61 concentrations at the time of necropsy.

62

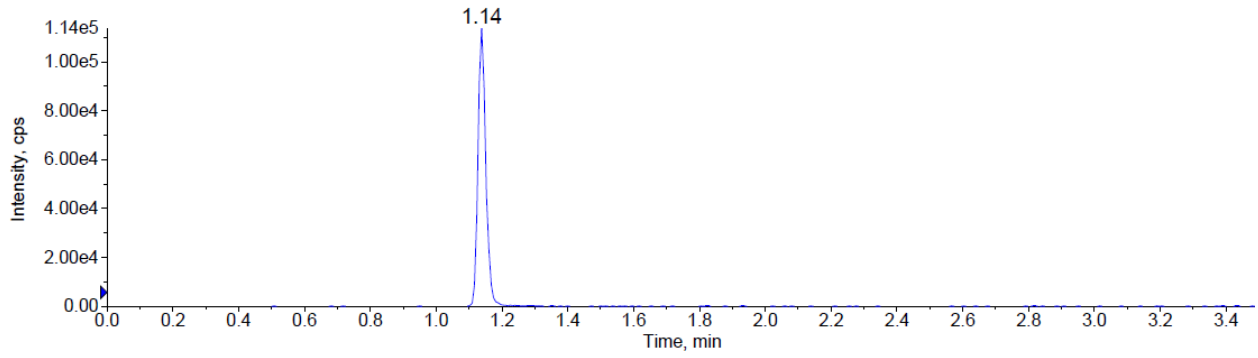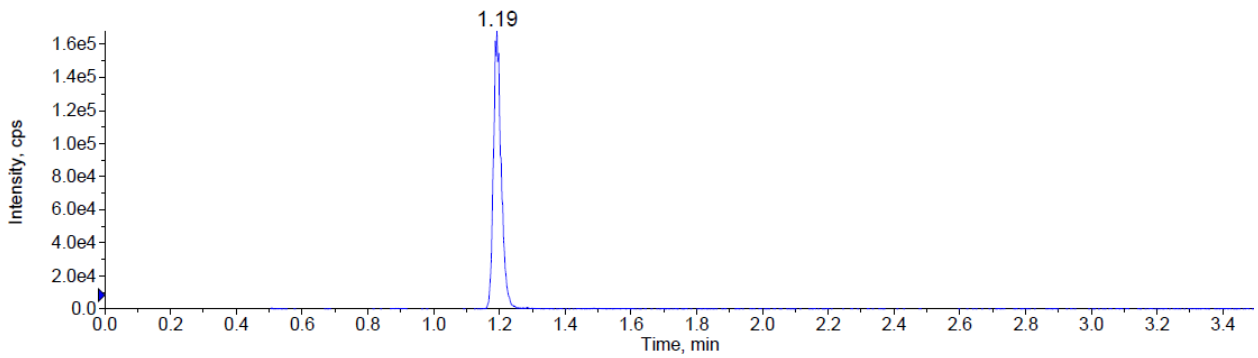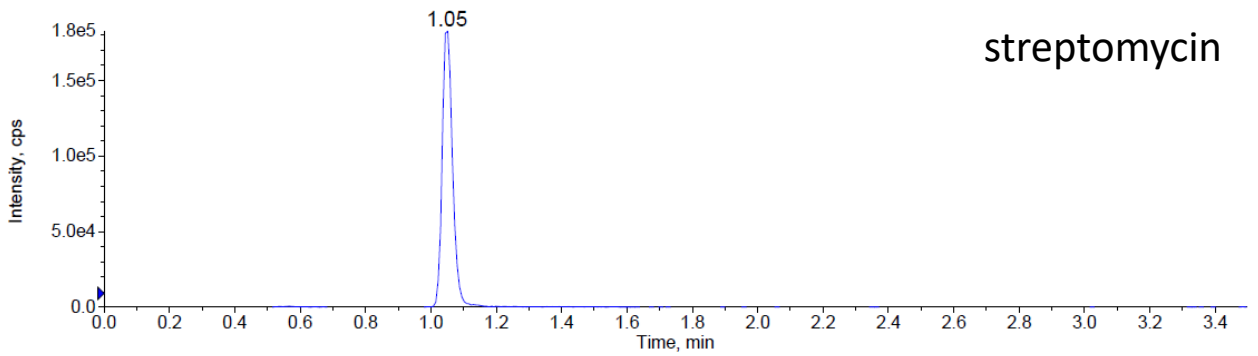

63

64 **Figure S5.** Typical plasma standard HPLC-MS/MS chromatograms for amikacin, kanamycin, and the  
65 internal standard streptomycin, at 5000 ng/mL.

66

67    **REFERENCES**

- 68    1.    Kato H, Hagihara M, Hirai J, Sakanashi D, Suematsu H, Nishiyama N, Koizumi Y, Yamagishi Y,  
69        Matsuura K, Mikamo H. 2017. Evaluation of Amikacin Pharmacokinetics and Pharmacodynamics  
70        for Optimal Initial Dosing Regimen. *Drugs R D* 17:177-187.
- 71    2.    Sadeghi K, Hamishehkar H, Najmeddin F, Ahmadi A, Hazrati E, Honarmand H, Mojtahedzadeh M.  
72        2018. High-dose amikacin for achieving serum target levels in critically ill elderly patients. *Infect*  
73        *Drug Resist* 11:223-228.
- 74    3.    Arechiga-Alvarado NA, Medellin-Garibay SE, Milan-Segovia RDC, Ortiz-Alvarez A, Magana-Aquino  
75        M, Romano-Moreno S. 2020. Population Pharmacokinetics of Amikacin Administered Once Daily  
76        in Patients with Different Renal Functions. *Antimicrob Agents Chemother* 64.
- 77    4.    Park SI, Oh J, Jang K, Yoon J, Moon SJ, Park JS, Lee JH, Song J, Jang IJ, Yu KS, Chung JY. 2015.  
78        Pharmacokinetics of Second-Line Antituberculosis Drugs after Multiple Administrations in  
79        Healthy Volunteers. *Antimicrob Agents Chemother* 59:4429-35.
- 80    5.    Tod M, Lortholary O, Seytre D, Semaoun R, Uzzan B, Guillevin L, Casassus P, Petitjean O. 1998.  
81        Population pharmacokinetic study of amikacin administered once or twice daily to febrile,  
82        severely neutropenic adults. *Antimicrob Agents Chemother* 42:849-56.
- 83    6.    Yew WW, Cheung SW, Chau CH, Chan CY, Leung CK, Cheng AF, Wong CF. 1999. Serum  
84        pharmacokinetics of antimycobacterial drugs in patients with multidrug-resistant tuberculosis  
85        during therapy. *Int J Clin Pharmacol Res* 19:65-71.
- 86    7.    Holdiness MR. 1984. Clinical pharmacokinetics of the antituberculosis drugs. *Clin Pharmacokinet*  
87        9:511-44.
- 88    8.    Illamola SM, Huynh HQ, Liu X, Bhakta ZN, Sherwin CM, Liou TG, Carveth H, Young DC. 2018.  
89        Population Pharmacokinetics of Amikacin in Adult Patients with Cystic Fibrosis. *Antimicrob*  
90        *Agents Chemother* 62.
- 91    9.    Strydom N, Gupta SV, Fox WS, Via LE, Bang H, Lee M, Eum S, Shim T, Barry CE, 3rd, Zimmerman  
92        M, Dartois V, Savic RM. 2019. Tuberculosis drugs' distribution and emergence of resistance in  
93        patient's lung lesions: A mechanistic model and tool for regimen and dose optimization. *PLoS*  
94        *Med* 16:e1002773.
